# Supplementary material for: A Mechanochemical Model for Embryonic Pattern Formation: Coupling Tissue Mechanics and Morphogen Expression
Source: PubMed Central journal article supplement (PMC3869727; doi:10.1371/journal.pone.0082617), 2013-12-20
Supplement: pone.0082617.s001.pdf [file pone.0082617.s001.pdf]

# A mechanochemical model for embryonic pattern formation: Coupling tissue mechanics and morphogen expression

## SUPPORTING INFORMATION

Moritz Mercker, Dirk Hartmann, Anna Marciniak-Czochra

### TABLE 1: Notations and definitions

For the convenience of the reader, let us shortly repeat the general notations and definitions used in this paper. For more details we refer to [1].

|                                      |                                                                                                                                           |
|--------------------------------------|-------------------------------------------------------------------------------------------------------------------------------------------|
| $\partial_i[\cdot]$                  | partial derivative with respect to $u_i$ .                                                                                                |
| $\partial_i\vec{X}$                  | basis vector of the tangential space, i.e.<br>$\partial_i\vec{X} = \partial_i[\vec{X}]$                                                   |
| $d_t[\cdot]$                         | total time derivative,                                                                                                                    |
| $(g_{ij})_{i,j}$                     | first fundamental tensor, $g_{ij} = \partial_i\vec{X} \cdot \partial_j\vec{X}$ , where $ds = \sqrt{g} d^2u$ , and $g$ is its determinant. |
| $(b_{ij})_{i,j}$                     | second fundamental tensor, $b_{ij} = -\partial_i\vec{X} \cdot \partial_j\vec{n}$ .                                                        |
| $g^{ij}$                             | component of the inverse first fundamental tensor,                                                                                        |
| $\int \dots ds$                      | surface integral on a manifold, $ds = \sqrt{g} d^2u$ .                                                                                    |
| $\nabla^\Gamma[\cdot]$               | first surface gradient: $\nabla^\Gamma[f] = \sum_{i,j} g^{ij} \partial_j[f] \partial_i\vec{X}$ ,                                          |
| $\Delta^\Gamma[\cdot]$               | first surface Laplacian: $\Delta^\Gamma[f] = \frac{1}{\sqrt{g}} \sum_{i,j} \partial_i[\sqrt{g} g^{ij} \partial_j[f]]$ .                   |
| $\delta^\alpha[F]$                   | Fréchet-derivative or variation with respect to $\alpha$ ,                                                                                |
| $\delta F / \delta \vec{X}(\vec{u})$ | strong formulation of $\delta^\alpha[F]$ in $\vec{X}(\vec{u})$ ,                                                                          |
| $H$                                  | mean curvature, $H = \text{trace}(\sum_k g^{jk} b_{ij})$ ,                                                                                |

## References

1. Mercker M, Marciniak-Czochra A, Hartmann D (2013) Modeling and computing of deformation dynamics of inhomogeneous biological surfaces. *SIAM J Appl Math* 73(5): 1768-1792.
